# Supplementary material for: Comparative Study of Metabolomic Profile and Antioxidant Content of Adult and In Vitro Leaves of Aristotelia chilensis
Source: MDPI journal article supplement (doi:10.3390/plants11010037), 2021-12-23
Supplement: s1 [file s1]

Supplementary Materials

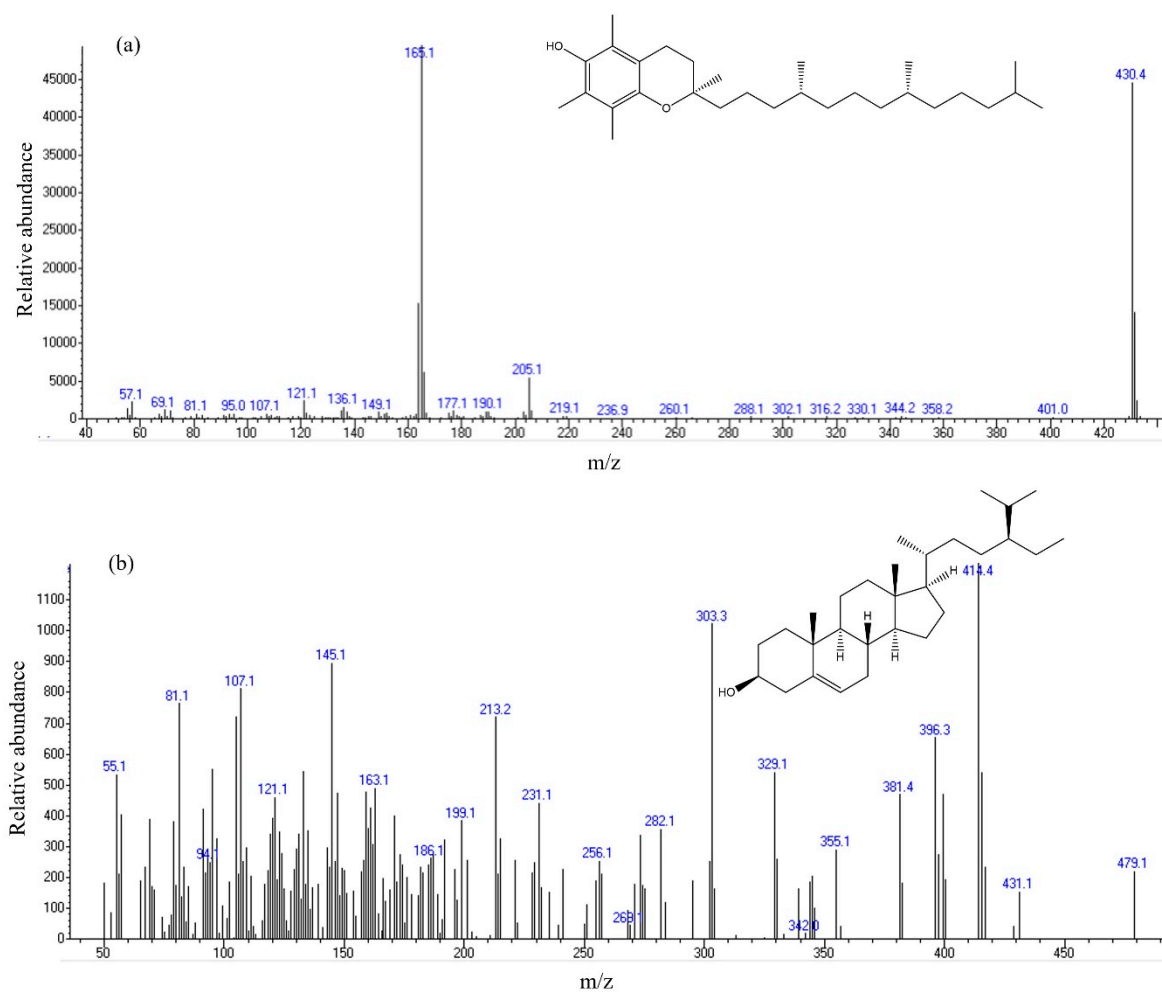

**Figure S1.** Mass spectra and chemical structure of  $\alpha$ -tocopherol (a) and  $\beta$ -sitosterol (b).

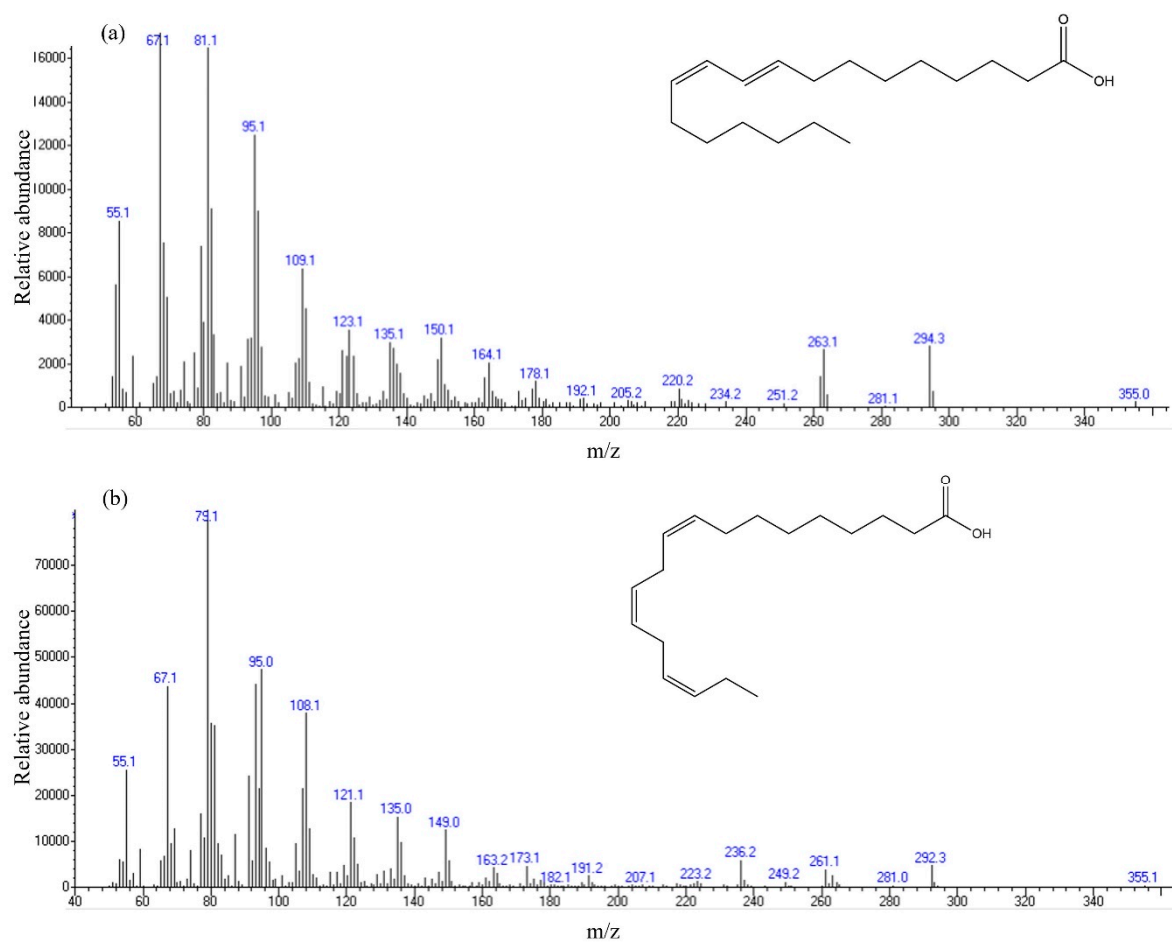

**Figure S2.** Mass spectra and chemical structure of linoleic acid (a) and linolenic acid (b).

**Table S1.** Detailed quantified profile of the methanolic extracts obtained from *A. chilensis* leaves ( $\mu\text{g g}^{-1}$  DW). Different letters in the same row indicate significant differences according to Tukey's test ( $p \leq 0.05$ ).

|      | Compounds                                  | AP S                 | BS S                 | AP W               | BS W                | IVITRO                |
|------|--------------------------------------------|----------------------|----------------------|--------------------|---------------------|-----------------------|
| Peak | Galloyl acids derivatives                  |                      |                      |                    |                     |                       |
| 1    | Galloyl-hexoside                           | 250.23 $\pm$ 10.35c  | 400.36 $\pm$ 8.21b   | 145.39 $\pm$ 4.40d | 68.16 $\pm$ 6.12e   | 2135.17 $\pm$ 144.39a |
| 2    | Galloyl quinic acid                        | 309.80 $\pm$ 9.95b   | 265.36 $\pm$ 5.21c   | 119.93 $\pm$ 2.07d | 83.09 $\pm$ 2.36d   | 1571.63 $\pm$ 148.94a |
| 4    | Di-galloyl quinic acid                     | 217.74 $\pm$ 6.25c   | 338.80 $\pm$ 3.32b   | 135.64 $\pm$ 3.00d | 211.09 $\pm$ 6.46c  | 880.93 $\pm$ 99.31a   |
|      | Caffeoyl quinic acids                      |                      |                      |                    |                     |                       |
| 3    | 3-caffeoyl quinic acid                     | 64.89 $\pm$ 0.57b    | 58.32 $\pm$ 1.29b    | 15.36 $\pm$ 0.14c  | 5.04 $\pm$ 0.05c    | 791.28 $\pm$ 20.87a   |
| 5    | 4-caffeoyl quinic acid                     | 24.78 $\pm$ 0.40c    | 29.51 $\pm$ 0.15b    | 6.21 $\pm$ 0.02d   | 1.86 $\pm$ 0.08e    | 44.73 $\pm$ 0.95a     |
|      | Ellagitannins                              |                      |                      |                    |                     |                       |
| 6    | Ellagitannin                               | 125.02 $\pm$ 5.06c   | 148.91 $\pm$ 1.15b   | 20.06 $\pm$ 0.23d  | 19.19 $\pm$ 0.34d   | 273.34 $\pm$ 24.98a   |
| 7    | Granatin B                                 | 1644.52 $\pm$ 33.88b | 1338.17 $\pm$ 18.10c | 563.66 $\pm$ 5.93d | 465.13 $\pm$ 13.07e | 1824.00 $\pm$ 65.61a  |
| 8    | Ellagitannin                               | 1537.27 $\pm$ 14.89c | 1868.62 $\pm$ 20.83b | 472.17 $\pm$ 4.22d | 431.01 $\pm$ 4.96d  | 2444.44 $\pm$ 74.18a  |
|      | Ellagic acid derivatives                   |                      |                      |                    |                     |                       |
| 9    | Ellagic acid-Hexoside                      | 14.05 $\pm$ 0.31b    | 11.29 $\pm$ 1.42c    | 2.82 $\pm$ 0.01d   | 2.10 $\pm$ 0.01d    | 18.61 $\pm$ 0.91a     |
| 10   | Ellagic acid-Pentoside                     |                      | 11.69 $\pm$ 0.28b    |                    |                     | 42.96 $\pm$ 3.78a     |
| 12   | Ellagic acid -Pentoside                    | 13.94 $\pm$ 0.12b    | 13.06 $\pm$ 0.11c    | 5.32 $\pm$ 0.10d   | 3.23 $\pm$ 0.05e    | 20.22 $\pm$ 3.31a     |
| 14   | Ellagic acid-Rhamnoside                    |                      |                      |                    |                     | 52.15 $\pm$ 5.86      |
| 17   | Ellagic acid                               |                      |                      |                    |                     | 26.39 $\pm$ 5.54      |
|      | Flavonoid derivatives                      |                      |                      |                    |                     |                       |
| 11   | Quercetin-3-(gallic acid)Hexoside          | 117.72 $\pm$ 0.59b   | 135.29 $\pm$ 0.57a   | 34.00 $\pm$ 0.69c  | 20.13 $\pm$ 0.30d   |                       |
| 13   | Quercetin-3-(2-Rhamnoside)Hexoside         | 37.11 $\pm$ 0.66a    | 36.73 $\pm$ 0.19a    | 19.83 $\pm$ 0.18b  | 10.36 $\pm$ 0.28c   |                       |
| 15   | Quercetin-3-(6-Rhamnoside)Hexoside         | 77.90 $\pm$ 0.43a    | 68.39 $\pm$ 0.26b    | 39.93 $\pm$ 0.60c  | 22.71 $\pm$ 0.38d   |                       |
| 16   | Quercetin-3-Hexoside                       | 152.18 $\pm$ 1.11b   | 165.64 $\pm$ 2.26a   | 59.70 $\pm$ 0.69c  | 26.52 $\pm$ 0.57d   |                       |
| 18   | Quercetin-3-Hexoside                       | 44.71 $\pm$ 1.24b    | 47.14 $\pm$ 1.09a    | 22.02 $\pm$ 0.34c  | 10.59 $\pm$ 0.18d   |                       |
| 19   | Quercetin-3-Rhamnoside                     | 45.45 $\pm$ 0.78a    | 40.83 $\pm$ 0.54a    | 7.53 $\pm$ 0.37c   | 7.67 $\pm$ 0.17b    |                       |
| 20   | Quercetin-3-Pentoside                      | 42.54 $\pm$ 0.43b    | 43.51 $\pm$ 0.16a    | 9.46 $\pm$ 0.06c   | 2.14 $\pm$ 0.34d    |                       |
|      |                                            |                      |                      |                    |                     | 224.85 $\pm$ 12.55a   |
| 21   | Tetrahydroxyflavone-(6-Rhamnoside)Hexoside | 143.82 $\pm$ 1.10b   | 130.57 $\pm$ 1.04c   | 64.45 $\pm$ 0.40d  | 49.85 $\pm$ 1.02e   |                       |
| 22   | Tetrahydroxyflavone-Hexoside               | 194.94 $\pm$ 1.06b   | 225.90 $\pm$ 4.03a   | 112.68 $\pm$ 1.72c | 73.48 $\pm$ 1.52d   | 220.75 $\pm$ 23.91a   |
| 23   | Trihydroxy-dimethoxyflavone                | 38.31 $\pm$ 0.48b    | 34.35 $\pm$ 0.51c    | 9.62 $\pm$ 0.09d   | 7.32 $\pm$ 0.09e    | 40.01 $\pm$ 3.33a     |

BS W: Basal winter leaves, AP W: apical winter leaves, BS S: basal spring leaves, AP S: apical spring leaves, and IVITRO: in vitro leaves.
